# Supplementary material
Source: PubMed Central journal article supplement (PMC1783410)
Supplement: pnas_0605442104_2.pdf [file pnas_0605442104_2.pdf]

## SUPPORTING INFORMATION

**Table 1. *S. pombe* strains used in this study**

| Name                   | Strain | Genotype                                                                                                                                         | Source           |
|------------------------|--------|--------------------------------------------------------------------------------------------------------------------------------------------------|------------------|
| WT                     | PB185  | <i>h</i> ( <i>Msmt0</i> ) <i>ura4-D18 leu1-32 ade6-210</i>                                                                                       | Lab stock        |
| <i>pli1C325S</i>       | BX270  | <i>h</i> ( <i>Msmt0</i> ) <i>ura4-D18 leu1-32 ade6-210 pli1C321S</i>                                                                             | B.X.             |
| <i>pli1Δ</i>           | BX214  | <i>h</i> ( <i>Msmt0</i> ) <i>ura4-D18 leu1-32 ade6-210 pli1Δ::KanMX6</i>                                                                         | B.X.             |
| <i>nse2.SA</i>         | BX392  | <i>h</i> ( <i>Msmt0</i> ) <i>ura4-D18 leu1-32 ade6-210 nse2C195S,H197A</i>                                                                       | B.X.             |
| <i>nse2.SA/ pli1Δ</i>  | BX393  | <i>h</i> ( <i>Msmt0</i> ) <i>ura4-D18 leu1-32 ade6-210 nse2C195S,H197A</i><br><i>pli1Δ::KanMX6</i>                                               | B.X.             |
| <i>pmt3+/-</i>         | JN628  | <i>h<sup>+</sup>/h<sup>-</sup> ura4-D18/ura4-D18 leu1-32/leu1-32 ade6-210/ade6-216 his3+/his3-D1 pmt3+/<math>\Delta</math>::ura4<sup>+</sup></i> | Katsunori Tanaka |
| <i>pli1Δ</i>           | BX282  | <i>h</i> <i>ura4-D18 leu1-32 ade6-210 pli1::NatMX4</i>                                                                                           | B.X.             |
| <i>pot1ΔN23</i>        | FP325D | <i>h<sup>+</sup> ura4-D18 leu1-32 ade6-210 his3-D1</i><br><i>pot1Δ::kanMX6+pNMT-pot1ΔN23</i>                                                     | Peter Baumann    |
| <i>pot1ΔN23 /pli1Δ</i> | FP325D | <i>h<sup>+</sup> ura4-D18 leu1-32 ade6-210 pot1Δ::kanMX6+pNMT-</i><br><i>pot1ΔN23 pli1::NatMX4</i>                                               | B.X.             |
| <i>pku70Δ</i>          | JCF723 | <i>h<sup>+</sup> his3-D1 ura4-D18 leu1-32 ade6-210 pku70Δ::KanMX6</i>                                                                            | Julie Cooper     |
| <i>pku70Δ /pli1Δ</i>   | BX382  | <i>h<sup>2</sup> his3-D1 ura4-D18 leu1-32 ade6-210 pku70Δ::KanMX6</i><br><i>pli1Δ::NatMX4</i>                                                    | B.X.             |
| <i>rad50Δ</i>          | YA622  | <i>h</i> <i>ura4-D18 leu1-32 ade6-210 arg3-D1 his3-D1</i><br><i>rad50Δ ::LEU2</i>                                                                | Hiroshi Iwasaki  |
| <i>rad50Δ /pli1Δ</i>   | BX350  | <i>h</i> <i>ura4-D18 leu1-32 ade6-210 rad50Δ ::LEU2</i><br><i>pli1::KanMX6</i>                                                                   | B.X.             |
| <i>swi7</i>            | SP848  | <i>h</i> <i>leu1-32 ade6-210 swi7</i>                                                                                                            | Amar Klar        |
| <i>swi7/pli1Δ</i>      | BX260  | <i>h<sup>+</sup>[LEU2] leu1-32 ade6M-210 swi7 pli1::KanMX6</i>                                                                                   | B.X.             |
| <i>swi1</i>            | SP814  | <i>h</i> <i>leu1-32 ade6M-210 swi1</i>                                                                                                           | Amar Klar        |
| <i>swi1/pli1Δ</i>      | BX256  | <i>h</i> <i>leu1-32 ade6M-210 swi1 pli1::KanMX6</i>                                                                                              | B.X.             |

|                    |          |                                                                                                                           |                  |
|--------------------|----------|---------------------------------------------------------------------------------------------------------------------------|------------------|
| <i>rad3Δ</i>       | YFS189   | <i>h<sup>-</sup> ura4-D18 leu1-32 ade6-104 rad3Δ ::ura4</i>                                                               | Nick Rhind       |
| <i>rad3Δ/pli1Δ</i> | BX252    | <i>h<sup>-</sup> ura4-D18 leu1-32 ade6-210 rad3Δ ::ura4 pli1::KanMX6</i>                                                  | B.X.             |
| <i>tel1Δ</i>       | SP261    | <i>h<sup>-</sup> ura4-D18 leu1-32 ade6-216 tel1Δ ::ura4</i>                                                               | Hiroshi Iwasaki  |
| <i>tel1Δ/pli1Δ</i> | BX254    | <i>h<sup>-</sup> ura4-D18 leu1-32 ade6-210 tel1Δ ::ura4 pli1::KanMX6</i>                                                  | B.X.             |
| <i>taz1Δ</i>       | BX350    | <i>h<sup>?</sup> ura4-D18 leu1-32 ade6-? taz1Δ::ura4</i>                                                                  | Julie Cooper     |
| <i>taz1Δ/pli1Δ</i> | BX351    | <i>h<sup>?</sup> ura4-D18 leu1-32 ade6-? taz1Δ::ura4 pli1::KanMX6</i>                                                     | B.X.             |
| <i>rap1Δ</i>       | JK774    | <i>h<sup>-</sup> ura4-D18 leu1-32 rap1Δ::ura4</i>                                                                         | Fuyuki Ishikawa  |
| <i>rap1Δ/pli1Δ</i> | BX364    | <i>h<sup>-</sup> ura4-D18 leu1-32 rap1Δ::ura4 pli1::KanMX6</i>                                                            | B.X.             |
| <i>rif1Δ</i>       | JK690    | <i>h<sup>-</sup> ura4-D18 leu1-32 rif1Δ::ura4</i>                                                                         | Fuyuki Ishikawa  |
| <i>rif1Δ/pli1Δ</i> | BX362    | <i>h<sup>-</sup> ura4-D18 leu1-32 rif1Δ::ura4 pli1::KanMX6</i>                                                            | B.X.             |
| <i>pli1Δ</i>       | BX214    | <i>h<sup>-</sup> (Msmt0) ura4-D18 leu1-32 ade6-210 pli1::KanMX6</i>                                                       | B.X.             |
| <i>rad22Δ</i>      | RGL6     | <i>h<sup>+</sup> ura4-D18 leu1-32 ade6-469 rad22A::ura4+</i>                                                              | Albert Pastink   |
| <i>rad51Δ</i>      | JAC1/51Δ | <i>h<sup>+</sup> ura4-D18 leu1-32 ade6-704 rad51::ura4+</i>                                                               | Sang Dai Park    |
| <i>rad50Δ</i>      | PB270    | <i>h<sup>+</sup> ura4-D18 leu1-32 ade6M-216 rad50::KanMX6</i>                                                             | Edgar Hartsuiker |
| <i>trt1 +/-</i>    | JCF448   | <i>h<sup>+</sup>/h<sup>-</sup> his3-D1/his3-D1 ura4-D18/ura4D18 leu1-32/leu-32<br/>ade6-210/ade6-216 trt1+ / -::his3+</i> | Julie Cooper     |
