# Supplementary material
Source: PubMed Central journal article supplement (PMC1783410)

| Tetrad                 | 1 |   |   |   | 2  |   |   |   |   |    |
|------------------------|---|---|---|---|----|---|---|---|---|----|
| <i>trt1</i>            | Δ |   | Δ |   | Δ  |   | Δ |   |   |    |
| <i>pli1</i>            | Δ |   |   |   | Δ  |   |   | Δ |   |    |
| Days after germination | 1 | 3 | 5 | 8 | 12 | 1 | 3 | 5 | 8 | 12 |

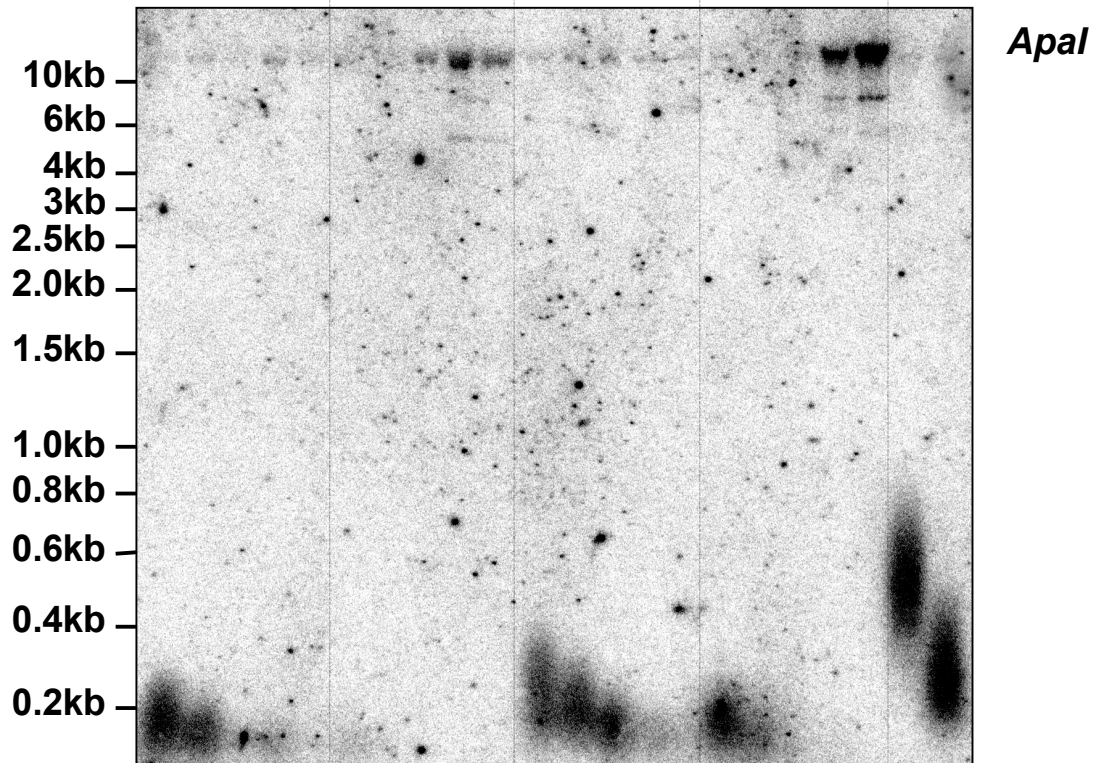

Supplement: pnas_0605442104_1.pdf [file pnas_0605442104_1.pdf]
